# Supplementary material for: Considerations for the Development of Mobile Phone Apps to Support Diabetes Self-Management: Systematic Review
Source: PubMed Central journal article supplement (PMC6035345; doi:10.2196/10115), 2018-06-21
Supplement: mhealth_v6i6e10115_app3.pdf [file mhealth_v6i6e10115_app3.pdf]

**Appendix 3: Other developmental considerations in studies and key clinical outcome-glycosylated hemoglobin.**

| Author, Year            | Data security and privacy consideration                                                                                                                                                                                                                                                          | Pilot testing                                                                                                                                                                                                                      | Health behavioural theory consideration | Key Clinical Outcome (HbA1 <sub>c</sub> ) <sup>1</sup>                                                                                                                                     |
|-------------------------|--------------------------------------------------------------------------------------------------------------------------------------------------------------------------------------------------------------------------------------------------------------------------------------------------|------------------------------------------------------------------------------------------------------------------------------------------------------------------------------------------------------------------------------------|-----------------------------------------|--------------------------------------------------------------------------------------------------------------------------------------------------------------------------------------------|
| <b>Kirwan, 2013[48]</b> | Not reported                                                                                                                                                                                                                                                                                     | Not reported                                                                                                                                                                                                                       | Not reported                            | The intervention group showed a significantly improved HbA <sub>1c</sub> from baseline to 9-month follow up compared to the control group.                                                 |
| <b>Quinn, 2011[43]</b>  | Data security in the mobile phone app was not reported. But for the web-based system; BG data were captured in real time into a HIPAA <sup>3</sup> -compliant secured web-based system, where it is processed to receive personalized feedback. (Quinn 2008, Quinn & Gruber-Baldin 2009)[54, 92] | Pilot tested for 3 months on 30 participants with type 2 diabetes with the aim to assess the impact of the software on HbA <sub>1c</sub> , and assessed provider's and patients satisfaction with the technology (Quinn, 2008)[54] | Not reported                            | One of the intervention group (maximal treatment) showed a significantly improved HbA <sub>1c</sub> from baseline to 12-month follow up compared to other intervention and control groups. |

|                               |                                                                                                                                                                                                                          |                                                                                                                                                                                                                                                                                           |                |                                                                                                                                                 |
|-------------------------------|--------------------------------------------------------------------------------------------------------------------------------------------------------------------------------------------------------------------------|-------------------------------------------------------------------------------------------------------------------------------------------------------------------------------------------------------------------------------------------------------------------------------------------|----------------|-------------------------------------------------------------------------------------------------------------------------------------------------|
| <b>Charpentier, 2011 [46]</b> | Data logged into app were automatically uploaded into a secured website, where they are available to the investigators at any time                                                                                       | Four month observational study of 35 type 1 diabetes patients. The aim was to confirm the use of personalized flexible intensive insulin therapy results in good control of the postprandial state. (Frac, 2009) [55].                                                                    | Not reported   | The full intervention group showed a significantly improved HbA <sub>1c</sub> from baseline to 6 month follow up compared to the control group. |
| <b>Quinn, 2016 [42]</b>       | See Quinn 2011                                                                                                                                                                                                           | See Quinn 2011                                                                                                                                                                                                                                                                            | See Quinn 2011 | Both the intervention and control group had reduced improvement in HbA <sub>1c</sub> after 12 months follow up.                                 |
| <b>Waki, 2014[50]</b>         | Not clear. Reported that participants measured data were transmitted to a server, following each new measurement that patient profile was updated which controlled access to patient's data and recorded access history. | One month pilot testing on 11 participants with type 2 diabetes. The aim was to assess the safety, usability and impact of mobile app on HbA <sub>1c</sub> and the effect on home BP <sup>4</sup> monitoring as a way of managing the complications related to diabetes. (Waki, 2012)[56] | Not reported   | The intervention group showed a significantly improved HbA <sub>1c</sub> from baseline to 3-month follow up compared to the control group.      |

|                         |              |                                                                                                                                                                                                                                                                                                                                                                                                                                                                                                                           |                                                                                                                                              |                                                                                                                                             |
|-------------------------|--------------|---------------------------------------------------------------------------------------------------------------------------------------------------------------------------------------------------------------------------------------------------------------------------------------------------------------------------------------------------------------------------------------------------------------------------------------------------------------------------------------------------------------------------|----------------------------------------------------------------------------------------------------------------------------------------------|---------------------------------------------------------------------------------------------------------------------------------------------|
| <b>Orsama, 2013[49]</b> | Not reported | Not reported                                                                                                                                                                                                                                                                                                                                                                                                                                                                                                              | Information-Motivation behavioural skill model was used as the basis for the formulation of automated personalized feedback message contents | The intervention group showed a significantly improved HbA1 <sub>c</sub> from baseline to 10-month follow up compared to the control group. |
| <b>Kim, 2014[52]</b>    | Not reported | Not reported                                                                                                                                                                                                                                                                                                                                                                                                                                                                                                              | Not reported                                                                                                                                 | Both the intervention and control groups had a non-significantly improved HbA1 <sub>c</sub> from baseline to 3-month follow up.             |
| <b>Rossi, 2010 [44]</b> | Not reported | The first pilot study was done with a questionnaire to assess the feasibility and acceptability of the app. A second pilot study was done on 41 patients using DID under routine clinical practice condition were evaluated after a medium of 9 months of follow up. The aim is to investigate effectiveness of the app on metabolic control. The second pilot study was on 50 people with type 1 diabetes aged 18-65 years, with the aim of investigating the feasibility and acceptability of the app (Rossi, 2009)[57] | Not reported                                                                                                                                 | Both the intervention and control groups had a non-significantly improved HbA1 <sub>c</sub> from baseline to 6-month follow up.             |

|                             |                 |                                                                                                                                    |                 |                                                                                                                                  |
|-----------------------------|-----------------|------------------------------------------------------------------------------------------------------------------------------------|-----------------|----------------------------------------------------------------------------------------------------------------------------------|
| <b>Holmen, 2014[51]</b>     | Not reported    | 12 people with type 2 diabetes participated in the testing of the app during an average test period of 167 days (Arsand, 2009)[93] | Not reported.   | Both the intervention and control groups had a non-significantly improved HbA <sub>1c</sub> from baseline to 12-month follow up. |
| <b>Rossi, 2013[45]</b>      | See Rossi, 2010 | See Rossi, 2010                                                                                                                    | See Rossi, 2010 | Both the intervention and control groups had a non-significantly improved HbA <sub>1c</sub> from baseline to 6-month follow up.  |
| <b>Istepanian, 2009[47]</b> | Not reported    | Not reported                                                                                                                       | Not reported    | HbA <sub>1c</sub> in the intervention and control groups remain unchanged after 9-month follow up.                               |

<sup>1</sup>HA1c: glycosylated haemoglobin

<sup>2</sup>BG: blood glucose

<sup>3</sup>HIPAA

<sup>4</sup>BP: blood pressure
